# Supplementary material for: Blocking the interaction between HIV-1 integrase and human LEDGF/p75: mutational studies, virtual screening and molecular dynamics simulations
Source: Royal Society of Chemistry journal article supplement (doi:10.1039/c3mb70418a), 2013-12-03
Supplement: c3mb70418a.pdf [file c3mb70418a.pdf]

**Figure S1.** RMSD of side chains of wild type and mutant forms during the simulation. (A) RMSD of wild type and mutant forms of IN-LEDGF/p75 complexes. (B) RMSD of only LEDGF/p75 in wild type and mutant forms of IN-LEDGF/p75 complexes through 10 ns MD simulations.

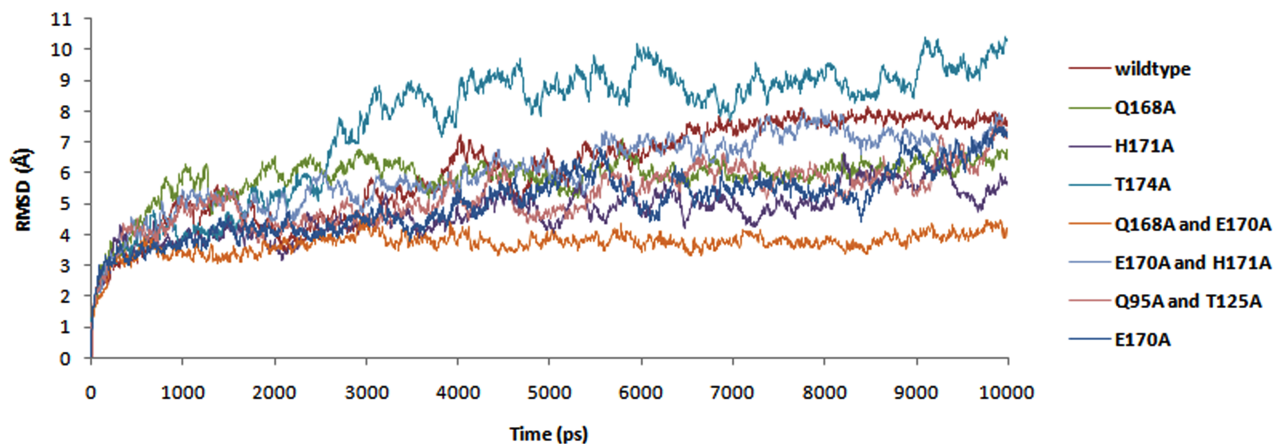

**Table S1.** Summary of model systems for MD simulations.

| IN-LEDGF/p75 complex models          | No. of Atoms | Time  |
|--------------------------------------|--------------|-------|
| Wild type                            | 70,729       | 10 ns |
| Single mutant form (Q168A)           | 70,797       | 10 ns |
| Single mutant form (E170A)           | 70,339       | 10 ns |
| Single mutant form (H171A)           | 70,764       | 10 ns |
| Single mutant form (T174A)           | 70,348       | 10 ns |
| Double mutant form (Q168A and E170A) | 70,785       | 10 ns |
| Double mutant form (E170A and H171A) | 70,775       | 10 ns |
| Double mutant form (Q95A and T125A)  | 70,724       | 10 ns |
